# Supplementary material for: Biogeographical role of the Kuroshio Current in the amphibious mudskipper Periophthalmus modestus indicated by mitochondrial DNA data
Source: PubMed Central journal article supplement (PMC4623607; doi:10.1038/srep15645), 2015-10-28

Supplementary Information for

**“Biogeographical role of the Kuroshio Current in the amphibious mudskipper *Periophthalmus modestus* indicated by mitochondrial DNA data”**

Lijun He<sup>1,2,\*</sup>, Takahiko Mukai<sup>3,†</sup>, Ka Hou Chu<sup>4,†</sup>, Qiang Ma<sup>5</sup>, Jing Zhang<sup>1</sup>

<sup>1</sup>State Key Laboratory of Estuarine and Coastal Research, East China Normal University, 200062, Shanghai, China

<sup>2</sup>East China Sea Fisheries Research Institute, Chinese Academy of Fishery Sciences, 200090, Shanghai, China;

<sup>3</sup>Faculty of Regional Studies, Gifu University, 1-1 Yanagido, 501-1193, Gifu, Japan

<sup>4</sup>Simon F. S. Li Marine Science Laboratory, School of Life Sciences, The Chinese University of Hong Kong, Hong Kong, China

<sup>5</sup>Chongming Dongtan National Nature Reserve, 202183, Shanghai, China

\*Correspondence: Lijun He, State Key Laboratory of Estuarine and Coastal Research, East China Normal University, Shanghai, 200062, China

Tel: 8621-52124974; fax: 8621-62546441; e-mail: tiger02j@hotmail.com

### Supplementary Information Table S1:

Geographic distribution and frequency of haplotypes from 12 localities in the northwestern Pacific Ocean

| Haplotypes | Coastal Japan<br>(I) |   |   |   |   |   | Okinawa<br>(II) | Coastal East<br>China (III) |   | South China Sea<br>(IV) |    |    | Total |
|------------|----------------------|---|---|---|---|---|-----------------|-----------------------------|---|-------------------------|----|----|-------|
|            | 1                    | 2 | 3 | 4 | 5 | 6 | 7               | 8                           | 9 | 10                      | 11 | 12 |       |
| N01        |                      |   |   |   |   |   |                 | 1                           |   |                         |    |    | 1     |
| N02        |                      |   |   |   |   |   |                 |                             |   | 1                       |    |    | 1     |
| N03        |                      |   |   |   |   |   |                 |                             | 1 |                         |    |    | 1     |
| N04        |                      |   |   |   |   |   |                 |                             |   |                         | 1  |    | 1     |
| N05        |                      |   |   |   |   |   |                 |                             |   | 1                       |    |    | 1     |
| N06        |                      |   |   |   |   |   |                 | 1                           |   |                         |    |    | 1     |
| N07        |                      |   |   |   |   |   |                 |                             |   |                         | 1  |    | 1     |
| N08        |                      |   |   |   |   |   |                 |                             |   | 1                       |    |    | 1     |
| N09        |                      |   |   |   |   |   |                 | 1                           |   |                         |    |    | 1     |
| N10        |                      |   |   |   |   |   |                 |                             |   | 1                       |    |    | 1     |
| N11        |                      |   |   |   |   |   |                 |                             |   | 1                       |    |    | 1     |
| N12        |                      |   |   |   |   |   |                 |                             |   | 2                       | 1  | 1  | 4     |
| N13        |                      |   |   |   |   |   |                 | 3                           |   |                         |    |    | 3     |
| N14        |                      |   |   |   |   |   |                 | 2                           |   | 1                       |    |    | 3     |
| N15        |                      |   |   |   |   |   |                 | 1                           |   |                         |    |    | 1     |
| N16        |                      |   |   |   |   |   |                 |                             |   |                         |    | 1  | 1     |
| N17        |                      |   |   |   |   |   |                 | 1                           |   |                         |    |    | 1     |
| N18        |                      |   |   |   |   |   |                 | 1                           |   |                         |    |    | 1     |
| N19        |                      |   |   |   |   |   |                 |                             |   | 1                       |    |    | 1     |
| N20        |                      |   |   |   |   |   |                 |                             |   | 1                       |    |    | 1     |
| N21        |                      |   |   |   |   |   |                 |                             |   | 1                       |    |    | 1     |
| N22        |                      |   |   |   |   |   |                 | 2                           |   |                         |    |    | 2     |
| N23        |                      |   |   |   |   |   |                 | 1                           |   |                         |    |    | 1     |
| N24        |                      |   |   |   |   |   |                 | 1                           |   |                         |    |    | 1     |
| N25        |                      |   | 3 |   | 1 |   |                 | 3                           |   |                         | 1  |    | 8     |
| N26        | 1                    |   |   |   |   |   |                 |                             |   |                         |    |    | 1     |
| N27        |                      |   |   |   |   |   |                 |                             |   |                         |    | 1  | 1     |
| N28        |                      |   |   |   |   |   |                 |                             |   |                         | 1  |    | 1     |
| N29        |                      |   |   |   |   |   |                 | 2                           |   |                         |    |    | 2     |
| N30        |                      |   |   |   |   |   |                 |                             |   | 1                       |    |    | 1     |
| N31        |                      |   |   |   |   |   |                 | 1                           |   |                         |    |    | 1     |
| N32        |                      |   |   |   |   |   |                 |                             |   | 1                       |    |    | 1     |
| N33        |                      |   |   |   |   |   |                 |                             |   | 1                       |    |    | 1     |
| N34        |                      |   |   |   |   |   |                 |                             |   | 1                       |    |    | 1     |
| N35        |                      |   |   |   |   |   | 3               |                             | 1 | 1                       |    |    | 5     |
| N36        |                      |   |   |   |   |   | 3               |                             |   |                         |    |    | 3     |

---

|     |   |   |   |   |   |  |  |   |   |    |    |   |
|-----|---|---|---|---|---|--|--|---|---|----|----|---|
| N37 |   |   |   |   |   |  |  | 1 |   | 1  |    |   |
| N38 |   |   |   |   |   |  |  | 1 |   | 1  |    |   |
| N39 |   |   |   |   | 1 |  |  |   |   | 1  |    |   |
| N40 |   |   |   |   |   |  |  | 1 |   | 1  |    |   |
| N41 |   |   |   |   |   |  |  | 1 |   | 1  |    |   |
| N42 |   |   |   |   |   |  |  | 1 |   | 1  |    |   |
| N43 |   |   |   |   |   |  |  |   | 1 | 1  |    |   |
| N44 |   | 1 |   |   |   |  |  |   |   | 1  |    |   |
| N45 |   |   |   |   |   |  |  |   |   | 1  |    |   |
| N46 | 4 | 7 | 2 | 1 | 3 |  |  | 1 |   | 18 |    |   |
| N47 |   |   |   |   |   |  |  | 1 |   | 1  |    |   |
| N48 |   |   |   |   |   |  |  |   | 1 | 1  |    |   |
| N49 |   |   |   |   |   |  |  |   | 1 | 1  |    |   |
| N50 |   | 1 |   |   |   |  |  |   |   | 1  |    |   |
| N51 |   |   | 1 |   |   |  |  |   |   | 1  |    |   |
| N52 |   | 1 |   |   |   |  |  |   |   | 1  |    |   |
| N53 | 1 |   |   |   |   |  |  |   |   | 1  |    |   |
| N54 |   | 1 |   |   |   |  |  |   |   | 1  |    |   |
| N55 |   | 1 |   |   |   |  |  |   |   | 1  |    |   |
| N56 |   |   |   |   |   |  |  |   | 1 | 1  |    |   |
| N57 |   |   |   |   |   |  |  |   | 1 | 1  |    |   |
| N58 |   |   |   |   |   |  |  |   | 1 | 1  |    |   |
| N59 |   |   |   |   |   |  |  | 1 |   | 1  |    |   |
| N60 |   |   |   |   |   |  |  |   | 1 | 1  |    |   |
| N61 |   |   |   |   |   |  |  |   | 1 | 1  |    |   |
| N62 |   |   |   |   |   |  |  |   | 1 | 1  |    |   |
| N63 |   |   |   |   |   |  |  |   | 1 | 1  |    |   |
| N64 |   |   |   |   |   |  |  |   | 1 | 1  |    |   |
| N65 | 1 |   |   | 3 | 1 |  |  | 3 | 2 | 1  | 11 |   |
| N66 |   |   |   |   |   |  |  |   | 1 |    | 1  |   |
| N67 |   |   |   |   |   |  |  |   | 1 |    | 1  |   |
| N68 |   |   |   |   |   |  |  |   | 1 |    | 1  |   |
| N69 |   |   |   |   |   |  |  | 1 | 2 |    | 1  | 4 |
| N70 |   |   |   |   |   |  |  | 1 |   |    |    | 1 |
| N71 |   |   |   |   | 1 |  |  |   |   |    |    | 1 |
| N72 |   |   |   |   |   |  |  |   | 1 |    |    | 1 |
| N73 |   |   |   |   | 1 |  |  |   |   |    |    | 1 |
| N74 |   |   |   |   | 1 |  |  |   |   |    |    | 1 |
| N75 |   |   |   |   |   |  |  |   | 1 |    |    | 1 |
| N76 |   |   |   |   |   |  |  |   | 1 |    |    | 1 |

---

**Supplementary Information Figure S1:**

Quartets of sequences from four clusters including a (outgroup), b (N66), c (N65, N67, N68, N69, N70, N71, N72, N73, N74, N75, N76), and d (the rest haplotypes) used in the likelihood mapping statistics.

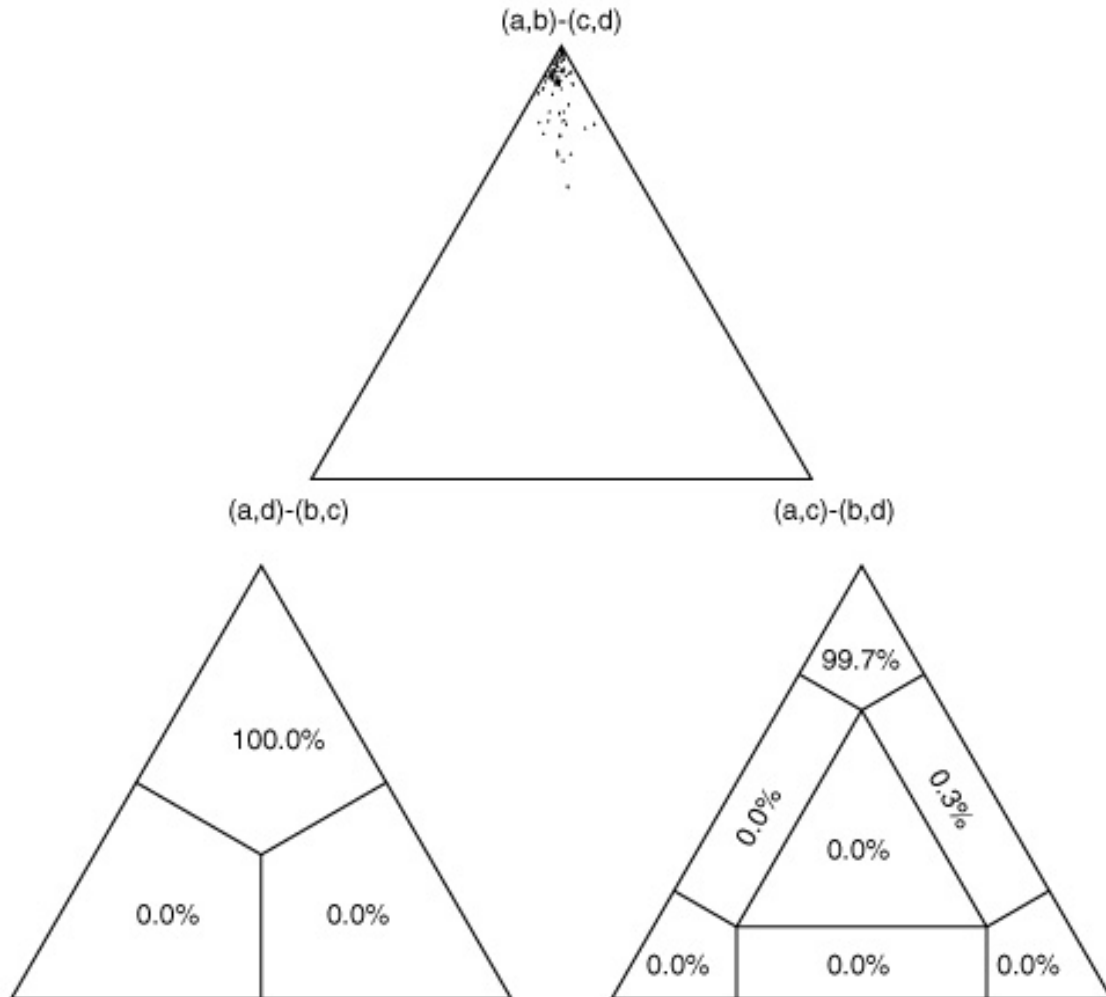

Supplement: srep15645-s1.pdf [file srep15645-s1.pdf]
